# Supplementary material for: Characterization of Two New Shiga Toxin-Producing Escherichia coli O103-Infecting Phages Isolated from an Organic Farm
Source: MDPI journal article supplement (doi:10.3390/microorganisms9071527), 2021-07-17
Supplement: s1 [file s1]

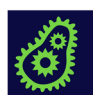

# Supplementary Materials

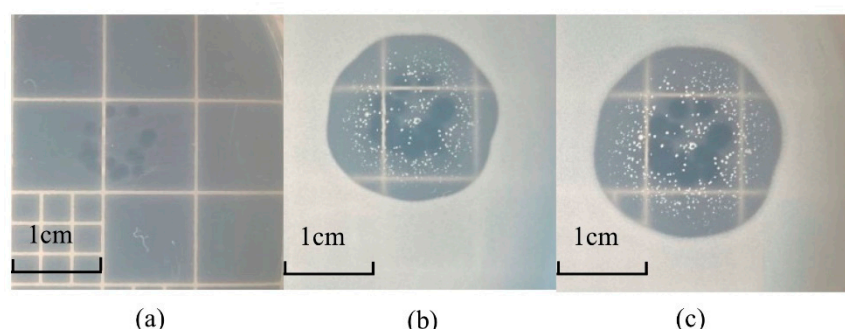

**Figure S1.** The appearance of plaques formed by phage Ro103C3lw on *E. coli* O103:H2 strain RM10744. The haloes of the lysis zones (plaques) grew in size from 0.72 cm to 2.15 cm after 3 h (a), 23 h (b), 27 h (c) of incubation at 37°C.

**Table S1.** List of annotated CDSs with the size, location, and predicted functions in the genome of Ro103C3lw.

| No. | Predicted CDSs*                                | Start (bp) | Stop (bp) | Length (bp) | Direction | Functional Category <sup>a</sup> |
|-----|------------------------------------------------|------------|-----------|-------------|-----------|----------------------------------|
| 1   | hypothetical protein                           | 837        | 995       | 159         | forward   | n/a                              |
| 2   | hypothetical protein                           | 1166       | 1498      | 333         | forward   | n/a                              |
| 3   | hypothetical protein                           | 1498       | 1653      | 156         | forward   | n/a                              |
| 4   | hypothetical protein                           | 1656       | 1781      | 126         | forward   | n/a                              |
| 5   | hypothetical protein                           | 1941       | 2138      | 198         | forward   | n/a                              |
| 6   | hypothetical protein                           | 2138       | 2464      | 327         | forward   | n/a                              |
| 7   | DNA-directed RNA polymerase                    | 2561       | 5227      | 2667        | forward   | DNA regulation and replication   |
| 8   | hypothetical protein                           | 5241       | 5441      | 201         | forward   | n/a                              |
| 9   | hypothetical protein                           | 5521       | 5976      | 456         | forward   | n/a                              |
| 10  | hypothetical protein                           | 6063       | 6242      | 180         | forward   | n/a                              |
| 11  | hypothetical protein                           | 6247       | 6510      | 264         | forward   | n/a                              |
| 12  | DNA ligase                                     | 6510       | 7571      | 1062        | forward   | DNA regulation and replication   |
| 13  | hypothetical protein                           | 7678       | 7932      | 255         | forward   | n/a                              |
| 14  | hypothetical protein                           | 7932       | 8309      | 378         | forward   | n/a                              |
| 15  | putative PTS sucrose transporter subunit IIABC | 8388       | 8564      | 177         | forward   | DNA regulation and replication   |
| 16  | host RNA polymerase inhibitor                  | 8545       | 8715      | 171         | forward   | DNA regulation and replication   |

|    |                                                     |       |       |      |         |                                |
|----|-----------------------------------------------------|-------|-------|------|---------|--------------------------------|
| 17 | helix-destabilizing protein                         | 8759  | 9457  | 699  | forward | DNA regulation and replication |
| 18 | endonuclease                                        | 9538  | 9912  | 375  | forward | DNA packaging                  |
| 19 | hypothetical protein                                | 9909  | 10133 | 225  | forward | n/a                            |
| 20 | endolysin                                           | 10123 | 10581 | 459  | forward | Host cell lysis                |
| 21 | hypothetical protein                                | 10596 | 10808 | 213  | forward | n/a                            |
| 22 | hypothetical protein                                | 10881 | 10976 | 96   | forward | n/a                            |
| 23 | primase/helicase protein                            | 10987 | 12690 | 1704 | forward | DNA regulation and replication |
| 24 | hypothetical protein                                | 12735 | 12899 | 165  | forward | n/a                            |
| 25 | DNA-directed DNA polymerase                         | 12973 | 15144 | 2172 | forward | DNA regulation and replication |
| 26 | putative HNS binding protein                        | 15144 | 15428 | 285  | forward | DNA regulation and replication |
| 27 | hypothetical protein                                | 15425 | 15634 | 210  | forward | n/a                            |
| 28 | hypothetical protein                                | 15631 | 15906 | 276  | forward | n/a                            |
| 29 | hypothetical protein                                | 15899 | 16207 | 309  | forward | n/a                            |
| 30 | exonuclease                                         | 16200 | 17066 | 867  | forward | DNA packaging                  |
| 31 | hypothetical protein                                | 17274 | 17546 | 273  | forward | n/a                            |
| 32 | hypothetical protein                                | 17558 | 17782 | 225  | forward | n/a                            |
| 33 | hypothetical protein                                | 17823 | 18188 | 366  | forward | n/a                            |
| 34 | head-to-tail joining protein                        | 18447 | 20015 | 1569 | forward | Phage morphogenesis            |
| 35 | capsid assembly protein                             | 20113 | 20988 | 876  | forward | Phage morphogenesis            |
| 36 | minor capsid protein                                | 21115 | 22164 | 1050 | forward | Phage morphogenesis            |
| 37 | hypothetical protein                                | 22233 | 22427 | 195  | forward | n/a                            |
| 38 | putative tail fiber protein /tail tubular protein A | 22488 | 23054 | 567  | forward | Phage morphogenesis            |
| 39 | putative tail fiber protein                         | 23066 | 25432 | 2367 | forward | Phage morphogenesis            |
| 40 | putative internal (core) protein                    | 25519 | 25980 | 462  | forward | Phage morphogenesis            |
| 41 | putative internal virion protein                    | 25965 | 26552 | 588  | forward | Phage morphogenesis            |
| 42 | internal virion protein                             | 26564 | 28846 | 2283 | forward | Phage morphogenesis            |

|    |                                              |       |       |      |         |                     |
|----|----------------------------------------------|-------|-------|------|---------|---------------------|
| 43 | hypothetical protein                         | 28849 | 29298 | 450  | forward | n/a                 |
| 44 | internal virion protein D                    | 29280 | 33176 | 3897 | forward | Phage morphogenesis |
| 45 | putative tail fiber protein                  | 33241 | 35331 | 2091 | forward | Phage morphogenesis |
| 46 | holin                                        | 35372 | 35566 | 195  | forward | Host cell lysis     |
| 47 | putative DNA packaging protein small subunit | 35563 | 35826 | 264  | forward | DNA packaging       |
| 48 | hypothetical protein                         | 35883 | 36254 | 372  | forward | n/a                 |
| 49 | endopeptidase Rz                             | 36273 | 36722 | 450  | forward | Host cell lysis     |
| 50 | terminase large subunit                      | 36719 | 38482 | 1764 | forward | DNA packaging       |
| 51 | hypothetical protein                         | 38771 | 38929 | 159  | forward | n/a                 |

\*CDS means coding DNA sequence.

<sup>a</sup>n/a means the CDSs are not annotated with any predicted functions.

**Table S2. List of annotated CDSs with the size, location, and predicted functions in the genome of Pr103Blw.**

| No. | Predicated CDSs*       | Start (bp) | Stop (bp) | Length (bp) | Direction | Functional category <sup>a</sup> |
|-----|------------------------|------------|-----------|-------------|-----------|----------------------------------|
| 1   | hypothetical protein   | 1213       | 1761      | 549         | reverse   | n/a                              |
| 2   | hypothetical protein   | 1775       | 2239      | 465         | reverse   | n/a                              |
| 3   | hypothetical protein   | 2229       | 2657      | 429         | reverse   | n/a                              |
| 4   | hypothetical protein   | 2712       | 2936      | 225         | reverse   | n/a                              |
| 5   | hypothetical protein   | 3013       | 3516      | 504         | reverse   | n/a                              |
| 6   | hypothetical protein   | 3513       | 3731      | 219         | reverse   | n/a                              |
| 7   | hypothetical protein   | 3815       | 4396      | 582         | reverse   | n/a                              |
| 8   | hypothetical protein   | 4396       | 4740      | 345         | reverse   | n/a                              |
| 9   | hypothetical protein   | 4733       | 5026      | 294         | reverse   | n/a                              |
| 10  | hypothetical protein   | 5026       | 5424      | 399         | reverse   | n/a                              |
| 11  | hypothetical protein   | 5417       | 5815      | 399         | reverse   | n/a                              |
| 12  | Putative lysis protein | 5866       | 6330      | 465         | reverse   | Host cell lysis                  |
| 13  | Putative tail protein  | 6330       | 7466      | 1137        | reverse   | Phage morphogenesis              |
| 14  | Tail protein           | 7463       | 7834      | 372         | reverse   | Phage morphogenesis              |
| 15  | hypothetical protein   | 7883       | 8473      | 591         | reverse   | n/a                              |
| 16  | hypothetical protein   | 8467       | 8700      | 234         | reverse   | n/a                              |
| 17  | hypothetical protein   | 9093       | 9464      | 372         | forward   | n/a                              |
| 18  | hypothetical protein   | 9546       | 10961     | 1416        | forward   | n/a                              |
| 19  | tRNA-Pro               | 11128      | 11207     | 80          | forward   | tRNA                             |
| 20  | tRNA-Glu               | 11215      | 11292     | 78          | forward   | tRNA                             |
| 21  | tRNA-Met               | 11384      | 11460     | 77          | forward   | tRNA                             |
| 22  | tRNA-Asn               | 11544      | 11620     | 77          | forward   | tRNA                             |
| 23  | tRNA-Tyr               | 11629      | 11716     | 88          | forward   | tRNA                             |
| 24  | tRNA-Asp               | 11722      | 11798     | 77          | forward   | tRNA                             |
| 25  | tRNA-Lys               | 12229      | 12304     | 76          | forward   | tRNA                             |
| 26  | tRNA-Met               | 12383      | 12459     | 77          | forward   | tRNA                             |

|    |                                         |       |       |      |         |                     |
|----|-----------------------------------------|-------|-------|------|---------|---------------------|
| 27 | tRNA-Ile                                | 12461 | 12536 | 76   | forward | tRNA                |
| 28 | tRNA-Arg                                | 12783 | 12859 | 77   | forward | tRNA                |
| 29 | tRNA-Ser                                | 13098 | 13187 | 90   | forward | tRNA                |
| 30 | tRNA-Leu                                | 13442 | 13518 | 77   | forward | tRNA                |
| 31 | tRNA-Lys                                | 13526 | 13601 | 76   | forward | tRNA                |
| 32 | tRNA-Ala                                | 13608 | 13683 | 76   | forward | tRNA                |
| 33 | tRNA-Gly                                | 13690 | 13764 | 75   | forward | tRNA                |
| 34 | tRNA-Thr                                | 13772 | 13847 | 76   | forward | tRNA                |
| 35 | tRNA-Val                                | 13944 | 14018 | 75   | forward | tRNA                |
| 36 | tRNA-Leu                                | 14020 | 14097 | 78   | forward | tRNA                |
| 37 | tRNA-Arg                                | 14103 | 14178 | 76   | forward | tRNA                |
| 38 | hypothetical protein                    | 14196 | 14438 | 243  | forward | n/a                 |
| 39 | hypothetical protein                    | 14435 | 14992 | 558  | forward | n/a                 |
| 40 | tRNA-Gln                                | 15001 | 15076 | 76   | forward | tRNA                |
| 41 | tRNA-Leu                                | 15079 | 15157 | 79   | forward | tRNA                |
| 42 | tRNA-Gln                                | 15163 | 15238 | 76   | forward | tRNA                |
| 43 | tRNA-His                                | 15270 | 15345 | 76   | forward | tRNA                |
| 44 | tRNA-Phe                                | 15352 | 15427 | 76   | forward | tRNA                |
| 45 | hypothetical protein                    | 15417 | 16178 | 762  | forward | n/a                 |
| 46 | tRNA-Ser                                | 16181 | 16273 | 93   | forward | tRNA                |
| 47 | tRNA-Cys                                | 16278 | 16353 | 76   | forward | tRNA                |
| 48 | hypothetical protein                    | 16576 | 16776 | 201  | forward | n/a                 |
| 49 | Terminase, large subunit                | 16798 | 18399 | 1602 | forward | DNA packaging       |
| 50 | hypothetical protein                    | 18416 | 19882 | 1467 | forward | n/a                 |
| 51 | hypothetical protein                    | 19882 | 20382 | 501  | forward | n/a                 |
| 52 | hypothetical protein                    | 20382 | 20714 | 333  | forward | n/a                 |
| 53 | Peptidase_S49 domain-containing protein | 20726 | 22072 | 1347 | forward | Phage morphogenesis |
| 54 | hypothetical protein                    | 22084 | 22461 | 378  | forward | n/a                 |
| 55 | Major capsid protein                    | 22495 | 23601 | 1107 | forward | Phage morphogenesis |
| 56 | hypothetical protein                    | 23623 | 24072 | 450  | forward | n/a                 |
| 57 | Tail fibers protein                     | 24072 | 24554 | 483  | forward | Phage morphogenesis |
| 58 | hypothetical protein                    | 24551 | 24952 | 402  | forward | n/a                 |
| 59 | hypothetical protein                    | 24927 | 25526 | 600  | forward | n/a                 |
| 60 | Tail sheath                             | 25527 | 26879 | 1353 | forward | Phage morphogenesis |
| 61 | hypothetical protein CDS                | 26895 | 27341 | 447  | forward | n/a                 |
| 62 | Tape measure chaperone                  | 27414 | 27812 | 399  | forward | Phage morphogenesis |
| 63 | Tape measure chaperone                  | 27815 | 28054 | 240  | forward | Phage morphogenesis |
| 64 | Tail length tape-measure protein        | 28054 | 30282 | 2229 | forward | Phage morphogenesis |
| 65 | hypothetical protein                    | 30282 | 31079 | 798  | forward | n/a                 |
| 66 | hypothetical protein                    | 31079 | 31420 | 342  | forward | n/a                 |
| 67 | hypothetical protein                    | 31420 | 32397 | 978  | forward | n/a                 |
| 68 | hypothetical protein                    | 32397 | 33020 | 624  | forward | n/a                 |

|     |                                               |       |       |      |         |                                |
|-----|-----------------------------------------------|-------|-------|------|---------|--------------------------------|
| 69  | Baseplate wedge protein                       | 33020 | 33439 | 420  | forward | Phage morphogenesis            |
| 70  | hypothetical protein                          | 33439 | 34908 | 1470 | forward | n/a                            |
| 71  | hypothetical protein                          | 34911 | 35765 | 855  | forward | n/a                            |
| 72  | hypothetical protein                          | 35765 | 36067 | 303  | forward | n/a                            |
| 73  | Putative tail fiber protein GP37              | 36070 | 37245 | 1176 | forward | Phage morphogenesis            |
| 74  | Tail fibers protein                           | 37292 | 39664 | 2373 | forward | Phage morphogenesis            |
| 75  | hypothetical protein                          | 39744 | 39941 | 198  | forward | n/a                            |
| 76  | Putative holin                                | 39938 | 40309 | 372  | forward | Host cell lysis                |
| 77  | Thymidylate synthase                          | 40347 | 41246 | 900  | reverse | DNA regulation and replication |
| 78  | Dihydrofolate reductase                       | 41248 | 41793 | 546  | reverse | DNA regulation and replication |
| 79  | hypothetical protein                          | 41790 | 42050 | 261  | reverse | n/a                            |
| 80  | hypothetical protein                          | 42051 | 42566 | 516  | reverse | n/a                            |
| 81  | hypothetical protein                          | 42580 | 42939 | 360  | reverse | n/a                            |
| 82  | Putative transcriptional regulatory protein   | 42941 | 43240 | 300  | reverse | DNA regulation and replication |
| 83  | hypothetical protein                          | 43233 | 43445 | 213  | reverse | n/a                            |
| 84  | hypothetical protein                          | 43447 | 43830 | 384  | reverse | n/a                            |
| 85  | DNA ligase                                    | 44263 | 45366 | 1104 | reverse | DNA regulation and replication |
| 86  | hypothetical protein                          | 45341 | 45901 | 561  | reverse | n/a                            |
| 87  | hypothetical protein                          | 45904 | 46095 | 192  | reverse | n/a                            |
| 88  | hypothetical protein                          | 46088 | 46255 | 168  | reverse | n/a                            |
| 89  | hypothetical protein                          | 46252 | 46554 | 303  | reverse | n/a                            |
| 90  | hypothetical protein                          | 46716 | 46862 | 147  | reverse | n/a                            |
| 91  | hypothetical protein                          | 46859 | 47077 | 219  | reverse | n/a                            |
| 92  | hypothetical protein                          | 47103 | 47282 | 180  | reverse | n/a                            |
| 93  | hypothetical protein                          | 47279 | 47488 | 210  | reverse | n/a                            |
| 94  | Putative DNA polymerase                       | 47550 | 50270 | 2721 | reverse | DNA regulation and replication |
| 95  | hypothetical protein                          | 50507 | 50929 | 423  | forward | n/a                            |
| 96  | Minor tail protein                            | 50931 | 51743 | 813  | forward | Phage morphogenesis            |
| 97  | Putative deoxynucleotide monophosphate kinase | 51805 | 52548 | 744  | forward | DNA regulation and replication |
| 98  | hypothetical protein                          | 52563 | 52757 | 195  | forward | n/a                            |
| 99  | Putative phage DNA primase/helicase           | 52750 | 54735 | 1986 | forward | DNA regulation and replication |
| 100 | hypothetical protein                          | 54710 | 54991 | 282  | forward | n/a                            |
| 101 | hypothetical protein                          | 54988 | 55137 | 150  | forward | n/a                            |
| 102 | hypothetical protein                          | 55210 | 56067 | 858  | forward | n/a                            |
| 103 | Putative exodeoxyribonuclease                 | 56130 | 57170 | 1041 | forward | DNA packaging                  |
| 104 | NAD synthetase                                | 57160 | 57657 | 498  | forward | DNA regulation and replication |
| 105 | hypothetical protein                          | 57679 | 57927 | 249  | forward | n/a                            |

|     |                                                 |       |       |      |         |                                |
|-----|-------------------------------------------------|-------|-------|------|---------|--------------------------------|
| 106 | Nucleoside triphosphate pyrophosphohydrolase    | 57903 | 58658 | 756  | forward | DNA regulation and replication |
| 107 | hypothetical protein                            | 58639 | 58962 | 324  | forward | n/a                            |
| 108 | hypothetical protein                            | 59054 | 59287 | 234  | forward | n/a                            |
| 109 | Ribonucleoside-diphosphate reductase            | 59334 | 61568 | 2235 | forward | DNA regulation and replication |
| 110 | hypothetical protein                            | 61540 | 61881 | 342  | forward | n/a                            |
| 111 | Ribonucleoside diphosphate reductase beta chain | 61878 | 62951 | 1074 | forward | DNA regulation and replication |
| 112 | Glutaredoxin domain-containing protein          | 62951 | 63193 | 243  | forward | DNA regulation and replication |
| 113 | hypothetical protein                            | 63186 | 63392 | 207  | forward | n/a                            |
| 114 | Anaerobic ribonucleoside-triphosphate reductase | 63441 | 65585 | 2145 | forward | DNA regulation and replication |
| 115 | Tail tube protein                               | 65937 | 66332 | 396  | forward | Phage morphogenesis            |
| 116 | hypothetical protein                            | 66329 | 66628 | 300  | forward | n/a                            |
| 117 | Anaerobic NTP reductase                         | 66638 | 67123 | 486  | forward | DNA regulation and replication |
| 118 | hypothetical protein                            | 67086 | 67463 | 378  | forward | n/a                            |
| 119 | hypothetical protein                            | 67430 | 67687 | 258  | forward | n/a                            |
| 120 | hypothetical protein                            | 67690 | 68010 | 321  | forward | n/a                            |
| 121 | hypothetical protein                            | 68095 | 68577 | 483  | forward | n/a                            |
| 122 | hypothetical protein                            | 68570 | 68848 | 279  | forward | n/a                            |
| 123 | hypothetical protein                            | 68862 | 69326 | 465  | forward | n/a                            |
| 124 | hypothetical protein                            | 69360 | 69812 | 453  | forward | n/a                            |
| 125 | Ribose-phosphate pyrophosphokinase              | 69803 | 70729 | 927  | forward | DNA regulation and replication |
| 126 | Putative nicotinate phosphoribosyltransferase   | 70775 | 72556 | 1782 | forward | DNA regulation and replication |
| 127 | hypothetical protein                            | 72610 | 72954 | 345  | forward | n/a                            |
| 128 | hypothetical protein                            | 72960 | 73295 | 336  | forward | n/a                            |
| 129 | Putative membrane protein                       | 73277 | 73453 | 177  | forward | Phage morphogenesis            |
| 130 | hypothetical protein                            | 73353 | 73469 | 117  | forward | n/a                            |
| 131 | RIIA lysis inhibitor                            | 73482 | 75848 | 2367 | forward | DNA regulation and replication |
| 132 | RIIB protein                                    | 75928 | 77037 | 1110 | forward | DNA regulation and replication |
| 133 | hypothetical protein                            | 77138 | 77686 | 549  | forward | n/a                            |
| 134 | Polynucleotide kinase                           | 77664 | 78359 | 696  | forward | DNA regulation and replication |
| 135 | hypothetical protein                            | 78371 | 78835 | 465  | forward | n/a                            |
| 136 | I-spanin                                        | 78888 | 79235 | 348  | forward | Host cell lysis                |
| 137 | O-spanin                                        | 79177 | 79398 | 222  | forward | Host cell lysis                |
| 138 | hypothetical protein                            | 79395 | 79664 | 270  | forward | n/a                            |
| 139 | hypothetical protein                            | 79661 | 79975 | 315  | forward | n/a                            |

|     |                                        |       |       |     |         |                                   |
|-----|----------------------------------------|-------|-------|-----|---------|-----------------------------------|
| 140 | Tail assembly protein                  | 79965 | 80291 | 327 | forward | Phage morpho-<br>genesis          |
| 141 | hypothetical protein                   | 80266 | 80499 | 234 | forward | n/a                               |
| 142 | hypothetical protein                   | 80492 | 80692 | 201 | forward | n/a                               |
| 143 | Macro domain-contain-<br>ing protein   | 80693 | 81478 | 786 | forward | DNA regulation<br>and replication |
| 144 | hypothetical protein                   | 81714 | 81872 | 159 | reverse | n/a                               |
| 145 | hypothetical protein                   | 82000 | 82380 | 381 | forward | n/a                               |
| 146 | hypothetical protein                   | 82470 | 82760 | 291 | forward | n/a                               |
| 147 | Tail sheath monomer                    | 82849 | 83145 | 297 | forward | Phage morpho-<br>genesis          |
| 148 | hypothetical protein                   | 83139 | 83471 | 333 | forward | n/a                               |
| 149 | hypothetical protein                   | 83560 | 83832 | 273 | forward | n/a                               |
| 150 | hypothetical protein                   | 83917 | 84321 | 405 | forward | n/a                               |
| 151 | Prohead assembly scaf-<br>fold protein | 84425 | 84628 | 204 | forward | Phage morpho-<br>genesis          |
| 152 | hypothetical protein                   | 84713 | 85255 | 543 | forward | n/a                               |
| 153 | hypothetical protein                   | 85322 | 85555 | 234 | forward | n/a                               |
| 154 | hypothetical protein                   | 85647 | 85988 | 342 | forward | n/a                               |
| 155 | hypothetical protein                   | 86211 | 86741 | 531 | forward | n/a                               |
| 156 | hypothetical protein                   | 86804 | 87067 | 264 | forward | n/a                               |
| 157 | hypothetical protein                   | 87135 | 87383 | 249 | forward | n/a                               |

\*CDS means coding DNA sequence.

<sup>a</sup>n/a means the CDSs are not annotated with any predicted functions.
